# Supplementary material for: Rationalising catalytic performance using a unique correlation matrix
Source: Royal Society of Chemistry journal article supplement (doi:10.1039/d4cc03193h), 2024-01-01
Supplement: d4cc03193h2.xlsx [file d4cc03193h2.xlsx]

## Sheet: Solvent Volume
DME MTY (gDME/kgMetal/h)					MeOH MTY (gMeOH/kgMetal/h)					DME Selectivity (%)					MeOH Selectivity (%)					Carbon Balance (%)
	Solvent Volume (mL)					Solvent Volume (mL)					Solvent Volume (mL)					Solvent Volume (mL)					Solvent Volume (mL)
Repeat	15	30	45		Repeat	15	30	45		Repeat	15	30	45		Repeat	15	30	45		Repeat	15	30	45
1	246.657	341.683	429.377		1	93.2661	128.961	170.787		1	78.6257	78.6565	77.7627		1	21.3743	21.3435	22.2373		1	95.9205	96.0843	94.7851
2	307.506	402.04	475.126		2	113.384	132.598	174.421		2	79.0457	80.8331	79.1185		2	20.9543	19.1669	20.8815		2	101.584	99.5176	95.268
3	158.943	364.955	423.115		3	47.3376	147.201	176.495		3	82.3641	77.5206	76.9293		3	17.6359	22.4794	23.0707		3	100.192	103.109	101.765
Average	237.702	369.559	442.54		Average	84.6626	136.254	173.901		Average	80.0118	79.0034	77.9368		Average	19.9882	20.9966	22.0632		Average	99.2322	99.5703	97.2728
Std. Dev.	74.6853	30.4409	28.3942		Std. Dev.	33.8534	9.65361	2.88919		Std. Dev.	2.04788	1.68327	1.10492		Std. Dev.	2.04788	1.68327	1.10492		Std. Dev.	2.95136	3.51274	3.89805

## Sheet: Drying Temperature
DME MTY (gDME/kgMetal/h)					MeOH MTY (gMeOH/kgMetal/h)					DME Selectivity (%)					MeOH Selectivity (%)					Carbon Balance (%)
	Drying Temperature (oC)					Drying Temperature (oC)					Drying Temperature (oC)					Drying Temperature (oC)					Drying Temperature (oC)
Repeat	50	80	120		Repeat	50	80	120		Repeat	50	80	120		Repeat	50	80	120		Repeat	50	80	120
1	59.4508	101.286	429.377		1	30.9271	46.7096	170.787		1	72.7799	75.1003	77.7627		1	27.2201	24.8997	22.2373		1	101.163	98.2414	94.7851
2	103.161	96.4351	475.602		2	39.2221	55.5261	174.595		2	78.5333	70.7234	79.1185		2	21.4667	29.2766	20.8815		2	102.175	101.148	95.268
3	137.318	145.003	423.115		3	47.8977	63.9012	176.495		3	79.9505	75.9399	76.9293		3	20.0495	24.0601	23.0707		3	100.75	101.596	101.765
Average	99.9765	114.241	442.698		Average	39.349	55.379	173.959		Average	77.0879	73.9212	77.9368		Average	22.9121	26.0788	22.0632		Average	101.363	100.328	97.2728
Std. Dev.	39.0311	26.7508	28.6669		Std. Dev.	8.48598	8.59673	2.90659		Std. Dev.	3.79751	2.80103	1.10492		Std. Dev.	3.79751	2.80103	1.10492		Std. Dev.	0.733583	1.82117	3.89805

## Sheet: Solvent
DME MTY (gDME/kgMetal/h)					MeOH MTY (gMeOH/kgMetal/h)					DME Selectivity (%)					MeOH Selectivity (%)					Carbon Balance (%)
	Solvent					Solvent					Solvent					Solvent					Solvent
Repeat	Water	Ethanol	Acetone		Repeat	Water	Ethanol	Acetone		Repeat	Water	Ethanol	Acetone		Repeat	Water	Ethanol	Acetone		Repeat	Water	Ethanol	Acetone
1	429.377	317.991	326.16		1	170.787	88.2762	63.6597		1	77.7627	83.3623	87.6944		1	22.2373	16.6377	12.3056		1	94.7851	99.1812	103.466
2	475.602	311.866	342.539		2	174.595	65.6034	77.3606		2	79.1185	86.8632	86.0311		2	20.8815	13.1368	13.9689		2	95.268	100.321	101.259
3	423.115	338.949	435.955		3	176.495	75.0331	76.4552		3	76.9293	86.2699	88.8033		3	23.0707	13.7301	11.1967		3	101.765	95.3612	95.6859
Average	442.698	322.935	368.218		Average	173.959	76.3042	72.4918		Average	77.9368	85.4985	87.5096		Average	22.0632	14.5015	12.4904		Average	97.2728	98.2877	100.137
Std. Dev.	28.6669	14.202	59.2305		Std. Dev.	2.90659	11.3897	7.66223		Std. Dev.	1.10492	1.87363	1.39529		Std. Dev.	1.10492	1.87363	1.39529		Std. Dev.	3.89805	2.59769	4.00941

## Sheet: Metal Loading
DME MTY (gDME/kgMetal/h)					MeOH MTY (gMeOH/kgMetal/h)					DME Selectivity (%)					MeOH Selectivity (%)					Carbon Balance (%)
	Cu:Zn:SAPO Ratio					Cu:Zn:SAPO Ratio					Cu:Zn:SAPO Ratio					Cu:Zn:SAPO Ratio					Cu:Zn:SAPO Ratio
Repeat	2:1:10	1:0.5:10	0.5:0.25:10		Repeat	2:1:10	1:0.5:10	0.5:0.25:10		Repeat	2:1:10	1:0.5:10	0.5:0.25:10		Repeat	2:1:10	1:0.5:10	0.5:0.25:10		Repeat	2:1:10	1:0.5:10	0.5:0.25:10
1	429.377	329.528	247.252		1	170.787	108.968	72.0365		1	77.7627	80.7924	82.6813		1	22.2373	19.2076	17.3187		1	94.7851	98.6704	102.272
2	475.602	337.629	323.603		2	174.595	88.7545	78.7805		2	79.1185	84.1048	85.1045		2	20.8815	15.8952	14.8955		2	95.268	97.2599	100.439
3	423.115	458.485	191.362		3	176.495	115.98	75.8779		3	76.9293	84.6119	77.8167		3	23.0707	15.3881	22.1833		3	101.765	91.797	94.6648
Average	442.698	375.214	254.072		Average	173.959	104.568	75.565		Average	77.9368	83.1697	81.8675		Average	22.0632	16.8303	18.1325		Average	97.2728	95.9091	99.1256
Std. Dev.	28.6669	72.2284	66.3838		Std. Dev.	2.90659	14.1363	3.38284		Std. Dev.	1.10492	2.07435	3.71146		Std. Dev.	1.10492	2.07435	3.71146		Std. Dev.	3.89805	3.63035	3.97036
